# Supplementary material
Source: Research Square preprint supplement (doi:10.21203/rs.3.rs-9712197/v1)
Supplement: Supplementary file 1 [file 9a83b0721fc7aab6db79bf9f.pdf]

## **Supplementary Material**

Supplementary Fig.S1. Distribution of 17 participating hospitals throughout South Korea

Supplementary Table S1. Categories and variables collected using the electronic case report form (eCRF)

Supplementary Table S2. Diagnostic platforms and *Mycoplasma pneumoniae* serologic assays used across participating hospitals

Supplementary Table S3. Seasonal distribution of etiologic groups in children with community-acquired pneumonia (CAP) by age group

Supplementary Table S4. Clinical features of children with community-acquired pneumonia (CAP) according to etiologic group

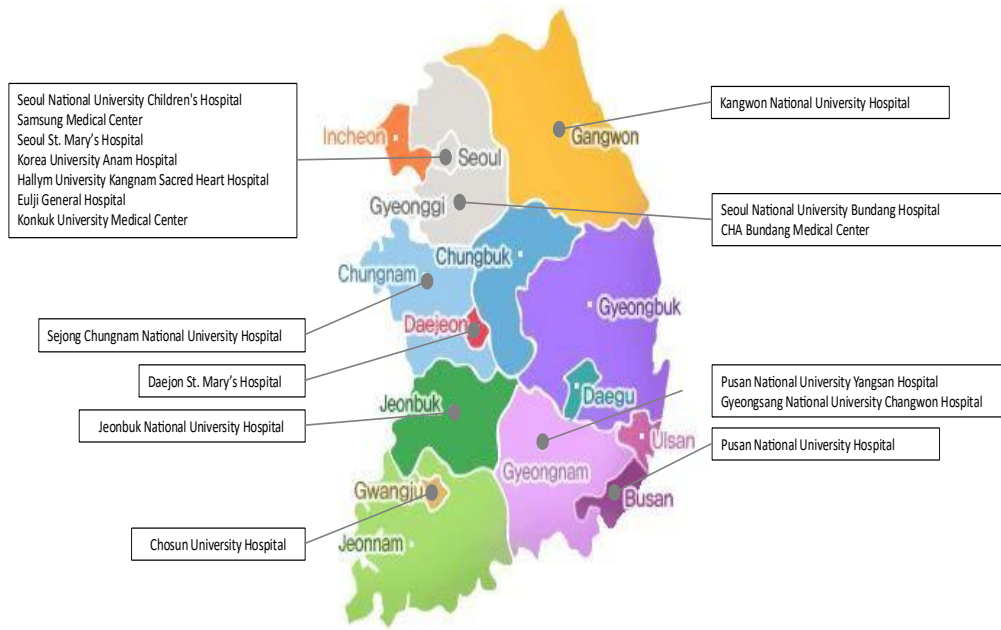

**Supplementary Fig. S1. Distribution of 17 participating hospitals throughout South Korea**

**Supplementary Table S1. Categories and Variables collected using the electronic case report form (eCRF)**

| Category                             | Variables collected                                                                                                                                                                                                                                                                |
|--------------------------------------|------------------------------------------------------------------------------------------------------------------------------------------------------------------------------------------------------------------------------------------------------------------------------------|
| Demographics                         | Age, sex                                                                                                                                                                                                                                                                           |
| Hospitalization                      | Hospital admission status, admission and discharge dates                                                                                                                                                                                                                           |
| Clinical presentation                | Symptom onset date, fever, cough, sputum, rhinorrhea, sore throat, chest pain, tachypnea, dyspnea, gastrointestinal symptoms, rash, seizure                                                                                                                                        |
| Vital signs and physical examination | Highest body temperature, highest respiratory rate, lowest oxygen saturation, auscultatory findings, chest retraction                                                                                                                                                              |
| Radiologic findings                  | Chest radiograph patterns including peribronchial infiltration, consolidation, pleural effusion, cavity or pneumatocele                                                                                                                                                            |
| Underlying medical conditions        | Prematurity, congenital heart disease, chronic neurologic, renal, gastrointestinal, endocrine, or pulmonary disease, asthma or allergic disease, genetic disease or congenital anomaly, primary immunodeficiency, hematologic or oncologic disease, and history of transplantation |
| Microbiologic testing                | Respiratory viral molecular testing, bacterial and atypical pathogen PCR assays, Mycoplasma pneumoniae serologic testing, bacterial cultures                                                                                                                                       |
| Laboratory findings                  | White blood cell count, C-reactive protein, procalcitonin                                                                                                                                                                                                                          |
| Treatment                            | Antibiotic therapy, antiviral therapy, systemic corticosteroid use for $\geq 3$ days                                                                                                                                                                                               |
| Respiratory support                  | the use of respiratory support [either noninvasive (nasal prong, oxygen mask, high-flow nasal cannula, or noninvasive positive pressure ventilation) or invasive respiratory support (invasive mechanical ventilation or extracorporeal membrane oxygenation)].                    |
| Clinical outcomes                    | Intensive care unit admission, complications, mortality, length of hospital stay, outcome at last follow-up                                                                                                                                                                        |

**Supplementary Table S2. Diagnostic platforms and *Mycoplasma pneumoniae* serologic assays used across participating hospitals**

| Location (Province) | Hospital                                      | Respiratory virus PCR                                                                                                            | Respiratory virus antigen test                                                                                                                                                                               | Atypical PCR <sup>a</sup>                                                      | <i>Mycoplasma pneumoniae</i> serology <sup>b</sup>                                                                 | Bacterial PCR <sup>c</sup>      |
|---------------------|-----------------------------------------------|----------------------------------------------------------------------------------------------------------------------------------|--------------------------------------------------------------------------------------------------------------------------------------------------------------------------------------------------------------|--------------------------------------------------------------------------------|--------------------------------------------------------------------------------------------------------------------|---------------------------------|
| Seoul               | Seoul National University Children's Hospital | Allplex™ Respiratory Panel 1/2/3 (Seegene, Seoul, Korea)                                                                         | BD Veritor System Flu A+B (Becton, Dickinson and Company, Franklin Lakes, NJ, USA), Ecoli Dx (Amplisens, Prague, Czech Republic) (Wonmed, Gyeonggi, Korea), BinaxNOW RSV Card (Abbott, Scarborough, ME, USA) |                                                                                | IgM LIAISON (DiaSorin), PA Serodia-Myc II (Fujirebio)                                                              |                                 |
|                     | Samsung Medical Center                        | BIOFIRE® Respiratory 2.1 plus Panel (bioMérieux, Marcy-l'Étoile, France)                                                         | Not performed                                                                                                                                                                                                |                                                                                | <i>M. pneumoniae</i> PCR (SCL, Yongin, Korea); BIOFIRE® Respiratory 2.1 Panel (bioMérieux, Marcy-l'Étoile, France) | PA Serodia-Myc II Not performed |
|                     | Seoul St. Mary's Hospital                     | AdvanSure™ RV-plus Real-Time RT-PCR (LG Chem, Seoul, Korea), BIOFIRE® Respiratory 2.1 Panel (bioMérieux, Marcy-l'Étoile, France) | Wonmed Covid-19 Ag (Wonmed, Gyeonggi, Korea)                                                                                                                                                                 | BioCore <i>M. pneumoniae</i> Real-Time PCR Kit (Invites BioCore, Seoul, Korea) | <i>M. pneumoniae</i> IgM CHORUS (Diesse), IgG LIAISON (DiaSorin)                                                   |                                 |
|                     | Korea University Anam Hospital                | Allplex™ Respiratory Panel 1/2/3 (Seegene, Seoul, Korea)                                                                         | BD Veritor System Flu A+B (Becton, Dickinson and Company, Franklin Lakes, NJ, USA)                                                                                                                           | <i>M. pneumoniae</i> PCR (GCLabs, Yongin, Korea)                               | IgM LIAISON (DiaSorin)                                                                                             |                                 |

| Location (Province) | Hospital                                        | Respiratory virus PCR                                                                                               | Respiratory antigen test                                                                  | virus Atypical PCR <sup>a</sup>                                         | <i>Mycoplasma</i> serology <sup>b</sup>                         | Bacterial PCR <sup>c</sup>                          |
|---------------------|-------------------------------------------------|---------------------------------------------------------------------------------------------------------------------|-------------------------------------------------------------------------------------------|-------------------------------------------------------------------------|-----------------------------------------------------------------|-----------------------------------------------------|
|                     |                                                 | Korea)                                                                                                              | Dickinson Company, Lakes, NJ, USA)                                                        | and Korea) Franklin                                                     |                                                                 |                                                     |
|                     | Hallym University Kangnam Sacred Heart Hospital | AllplexRespiratory 1/2/3 (Seegene, Korea), BIOFIRE® Respiratory 2.1 Plus Panel (bioMérieux, Marcy-l'Étoile, France) | BD Veritor System Flu A+B Dickinson Company, Lakes, NJ, USA)                              | (Becton, and Franklin Korea)                                            | Allplex PneumoBacter Assay IgM LIAISON (DiaSorin) Seoul, Korea) | Allplex™ PneumoBacter Assay (Seegene, Seoul, Korea) |
|                     | Eulji General Hospital                          | AllplexRespiratory 1/2/3 (Seegene, Korea)                                                                           | BD Veritor System Flu A+B Dickinson Company, Lakes, NJ, USA)                              | (Becton, and Franklin Yongin, Korea)                                    | Bacterial Multiplex PCR (GCLabs, Diesse)                        | Bacterial Multiplex PCR (GCLabs, Yongin, Korea)     |
|                     | Konkuk University Medical Center                | BIOFIRE® Respiratory 2.1 Plus Panel (bioMérieux, Marcy-l'Étoile, France)                                            | Not performed                                                                             | BIOFIRE Respiratory 2.1 Plus Panel (bioMérieux, Marcy-l'Étoile, France) | IgM CHORUS (Diesse)                                             | Not performed                                       |
| Gyeonggi-do         | CHA Bundang Medical Center                      | BIOFIRE® Respiratory 2.1 Panel (bioMérieux, Marcy-l'Étoile, France)                                                 | BD Veritor System Flu A+B Dickinson Company, Lakes, NJ, USA), STANDARD Q COVID-19 Ag Test | (Becton, and Franklin l'Étoile, France)                                 | IgM LIAISON Respiratory 2.1 Panel (DiaSorin), CHORUS (Diesse)   | Not performed                                       |

| Location (Province) | Hospital                                     | Respiratory virus PCR                                        | Respiratory antigen test                   | virus                                                                                                                                                       | Atypical PCR <sup>a</sup>                                                                     | <i>Mycoplasma</i> serology <sup>b</sup> | Bacterial PCR <sup>c</sup>                         |
|---------------------|----------------------------------------------|--------------------------------------------------------------|--------------------------------------------|-------------------------------------------------------------------------------------------------------------------------------------------------------------|-----------------------------------------------------------------------------------------------|-----------------------------------------|----------------------------------------------------|
|                     |                                              |                                                              | (SD Biosensor, Suwon, Korea)               |                                                                                                                                                             |                                                                                               |                                         |                                                    |
|                     | Seoul National University Bundang Hospital   | Allplex Respiratory 1/2/3 (Seegene, Korea)                   | Panel (Seegene, Seoul, Korea)              | Standard F Influenza A/B FIA (SD Biosensor, Seoul, Korea), Standard F Ag FIA (SD Biosensor, Seoul, Korea), Standard SARS-CoV-2 (SD Biosensor, Seoul, Korea) | NxTAG (Luminex Corporation, Austin, USA); Allplex™ PneumoBacter Assay (Seegene, Seoul, Korea) | RPP IgM R-FIND (SG Medical)             | Not performed                                      |
| <b>Daejeon</b>      | Daejeon St. Mary's Hospital                  | AllplexRespiratory 1/2/3 (Seegene, Korea)                    | Panel (Seegene, Seoul, Korea)              | Not performed                                                                                                                                               | Allplex PneumoBacter Assay (Seegene, Seoul, Korea)                                            | IgM CHORUS (Diesse)                     | Allplex PneumoBacter Assay (Seegene, Seoul, Korea) |
| <b>Sejong</b>       | Sejong Chungnam National University Hospital | BIOFIRE Respiratory 2.1 Panel (bioMérieux, l'Étoile, France) | Panel (bioMérieux, Marcy-l'Étoile, France) | Not performed                                                                                                                                               | BIOFIRE Respiratory 2.1 Panel (bioMérieux, Marcy-l'Étoile, France)                            | IgM LIAISON (DiaSorin)                  | Allplex PneumoBacter Assay (Seegene, Seoul, Korea) |
| <b>Jeonbuk</b>      | Jeonbuk National University Hospital         | BIOFIRE Respiratory 2.1 Panel (bioMérieux, l'Étoile, France) | Panel (bioMérieux, Marcy-l'Étoile, France) | Not performed                                                                                                                                               | BIOFIRE Respiratory 2.1 Panel (bioMérieux, Marcy-l'Étoile, France)                            | IgM LIAISON (DiaSorin)                  | Not performed                                      |
| <b>Gyeongnam</b>    | Pusan National University                    | BIOFIRE Respiratory 2.1                                      | QuantumPACK                                | Easy Bacterial                                                                                                                                              | Multiplex IgM                                                                                 | LIAISON                                 | Bacterial                                          |

| Location (Province) | Hospital                             | Respiratory virus PCR                                                        | Respiratory antigen test                                                | virus                            | Atypical PCR <sup>a</sup>                                                                                                                          | <i>Mycoplasma</i> serology <sup>b</sup>                                                      | Bacterial PCR <sup>c</sup>                                                                         |
|---------------------|--------------------------------------|------------------------------------------------------------------------------|-------------------------------------------------------------------------|----------------------------------|----------------------------------------------------------------------------------------------------------------------------------------------------|----------------------------------------------------------------------------------------------|----------------------------------------------------------------------------------------------------|
|                     | Yangsan Hospital                     | Panel (bioMérieux, Marcy-l'Étoile, France)                                   | Influenza A+B( BioSquare, Korea),<br>Covid-19 (Wonmed, Gyeonggi, Korea) |                                  | PCR (SCL, Yongin, Korea);<br><i>pneumoniae</i> PCR (Seegene, Seoul, Korea);<br>BIOFIRE® Respiratory 2.1 Panel (bioMérieux, Marcy-l'Étoile, France) | <i>M. pneumoniae</i> PCR (DiaSorin)                                                          | Multiplex PCR (SCL, Yongin, Korea);                                                                |
|                     | Gyeongsang University Hospital       | National BIOFIRE Respiratory 2.1 Panel (bioMérieux, Marcy-l'Étoile, France), | STANDARD Influenza A/B Biosensor, Korea)                                | FIA (SD Biosensor, Suwon, Korea) | BioFire Pneumonia Panel (bioMérieux, Marcy-l'Étoile, France)                                                                                       | <i>Mycoplasma pneumoniae</i> Antibody Diagnostic Reagent (Livzon Diagnostics, Zhuhai, China) | BioFire FilmArray Pneumonia Panel (bioMérieux, Marcy-l'Étoile, France)                             |
| <b>Busan</b>        | Pusan National University Hospital   | AdvanSure™ RV-plus Real-Time RT-PCR (Invitros, Seoul, Korea)                 | Not performed                                                           |                                  | Respiratory Pathogen Bacteria Panel [multiplex real-time PCR] (GC Labs, Yongin, Republic of Korea)                                                 | IgM CHORUS (Diesse)                                                                          | Respiratory Pathogen Bacteria Panel [multiplex real-time PCR] (GC Labs, Yongin, Republic of Korea) |
| <b>Gangwon</b>      | Kangwon National University Hospital | BIOFIRE Respiratory 2.1 Panel (bioMérieux, Marcy-l'Étoile, France)           | STANDARD COVID-19                                                       | FIA                              | BIOFIRE Respiratory 2.1 Panel                                                                                                                      | IgM CHORUS (Diesse)                                                                          | Allplex™ PneumoBacter                                                                              |

| Location (Province) | Hospital                   | Respiratory virus PCR                                               | Respiratory virus antigen test                            | Atypical PCR <sup>a</sup>                                                                                               | <i>Mycoplasma</i> serology <sup>b</sup> | Bacterial PCR <sup>c</sup>                          |
|---------------------|----------------------------|---------------------------------------------------------------------|-----------------------------------------------------------|-------------------------------------------------------------------------------------------------------------------------|-----------------------------------------|-----------------------------------------------------|
|                     |                            | l'Étoile, France), Allplex™ (SD Biosensor, Suwon, Korea)            |                                                           | (bioMérieux, Marcy-l'Étoile, France); Allplex™ PneumoBacter Assay (Seegene, Seoul, Korea)                               |                                         | Assay (Seegene, Seoul, Korea)                       |
| <b>Gwangju</b>      | Chosun University Hospital | BIOFIRE Respiratory 2.1 Panel (bioMérieux, Marcy-l'Étoile, France); | Sofia Influenza A+B FIA (QuidelOrtho, San Diego, CA, USA) | BIOFIRE Respiratory 2.1 Panel (bioMérieux, Marcy-l'Étoile, France); Allplex™ PneumoBacter Assay (Seegene, Seoul, Korea) | IgM LIAISON (DiaSorin)                  | Allplex™ PneumoBacter Assay (Seegene, Seoul, Korea) |

Blank cells indicate that the corresponding diagnostic test was not performed at that institution.

<sup>a</sup> Atypical PCR included assays for *Mycoplasma pneumoniae*, *Chlamydia pneumoniae*, *Legionella pneumophila*, *Bordetella pertussis*, and *Bordetella parapertussis*.

<sup>b</sup> Serologic assays included particle agglutination (PA), chemiluminescent immunoassay (CLIA), and enzyme-linked immunosorbent assay (ELISA).

<sup>c</sup> Bacterial PCR included assays for *Streptococcus pneumoniae* and *Haemophilus influenzae* and was performed only when clinically indicated.

**Supplementary Table S3.** Seasonal Distribution of Etiologic groups in Children with Community-Acquired Pneumonia (CAP) by age group.

| Age group           | Season <sup>a</sup> | Atypical CAP | Pyogenic CAP | Viral CAP | No pathogen | Total     |    |
|---------------------|---------------------|--------------|--------------|-----------|-------------|-----------|----|
| All ages            | Fall                | 22 (30.1)    | 5 (6.8)      | 21 (28.8) | 25 (34.2)   | 73        |    |
|                     | Winter              | 6 (23.1)     | 3 (11.5)     | 12 (46.2) | 5 (19.2)    | 26        |    |
|                     | Spring              | 27 (25.0)    | 2 (1.9)      | 36 (33.3) | 43 (39.8)   | 108       |    |
|                     | Summer              | 132 (64.4)   | 3 (1.5)      | 22 (10.7) | 48 (23.4)   | 205       |    |
|                     | Fall <sup>b</sup>   | 109 (64.9)   | 2 (1.2)      | 17 (10.1) | 40 (23.8)   | 168       |    |
|                     | Winter <sup>b</sup> | 20 (19.2)    | 3 (2.9)      | 61 (58.7) | 20 (19.2)   | 104       |    |
|                     | Spring              | 7 (12.5)     | 2 (3.6)      | 29 (51.8) | 18 (32.1)   | 56        |    |
|                     | <5 years            | Fall         | 8 (19.0)     | 2 (4.8)   | 17 (40.5)   | 15 (35.7) | 42 |
|                     |                     | Winter       | 1 (6.3)      | 1 (6.3)   | 12 (75.0)   | 2 (12.5)  | 16 |
|                     |                     | Spring       | 4 (8.0)      | 0 (0.0)   | 23 (46.0)   | 23 (46.0) | 50 |
| Summer <sup>b</sup> |                     | 25 (43.9)    | 1 (1.8)      | 13 (22.8) | 18 (31.6)   | 57        |    |
| Fall <sup>b</sup>   |                     | 30 (51.7)    | 0 (0.0)      | 11 (19.0) | 17 (29.3)   | 58        |    |
| Winter              |                     | 7 (10.6)     | 1 (1.5)      | 47 (71.2) | 11 (16.7)   | 66        |    |
| Spring              |                     | 3 (7.0)      | 0 (0.0)      | 25 (58.1) | 15 (34.9)   | 43        |    |
| ≥5 years            |                     | Fall         | 14 (45.2)    | 3 (9.7)   | 4 (12.9)    | 10 (32.3) | 31 |
|                     |                     | Winter       | 5 (50.0)     | 2 (20.0)  | 0 (0.0)     | 3 (30.0)  | 10 |
|                     |                     | Spring       | 23 (39.7)    | 2 (3.4)   | 13 (22.4)   | 20 (34.5) | 58 |
|                     | Summer <sup>b</sup> | 107 (72.3)   | 2 (1.4)      | 9 (6.1)   | 30 (20.3)   | 148       |    |
|                     | Fall <sup>b</sup>   | 79 (71.8)    | 2 (1.8)      | 6 (5.5)   | 23 (20.9)   | 110       |    |
|                     | Winter              | 13 (34.2)    | 2 (5.3)      | 14 (36.8) | 9 (23.7)    | 38        |    |
|                     | Spring              | 4 (30.8)     | 2 (15.4)     | 4 (30.8)  | 3 (23.1)    | 13        |    |

Values are presented as n (%), with percentages calculated for each season and age group.

<sup>a</sup> Seasons are presented in chronological order from fall 2023 through spring 2025. The *M. pneumoniae* epidemic period corresponded to the summer and fall 2024.

<sup>b</sup> *Mycoplasma pneumoniae* epidemic period.

**Supplementary Table S4. Clinical Features of Children With Community-Acquired Pneumonia (CAP) According to Etiologic Group**

| <b>Variable</b>                                                   | <b>Viral CAP<br/>(N=198)</b> | <b>Atypical<br/>(N=323)</b> | <b>Pyogenic<br/>(N=20)</b> | <b><i>P</i><br/>value</b> |
|-------------------------------------------------------------------|------------------------------|-----------------------------|----------------------------|---------------------------|
| <b>Clinical Presentation</b>                                      |                              |                             |                            |                           |
| Fever                                                             | 173 (87.4)                   | 307 (95.0)                  | 19 (95.0)                  | 0.006                     |
| Cough                                                             | 190 (96.0)                   | 313 (96.9)                  | 14 (70.0)                  | <0.001                    |
| Rhinorrhea                                                        | 83 (41.9)                    | 66 (20.4)                   | 3 (15.0)                   | <0.001                    |
| Dyspnea                                                           | 64 (32.3)                    | 48 (14.9)                   | 8 (40.0)                   | <0.001                    |
| Rales                                                             | 111 (56.1)                   | 159 (49.2)                  | 8 (40.0)                   | 0.185                     |
| Wheezing                                                          | 69 (34.8)                    | 41 (12.7)                   | 2 (10.0)                   | <0.001                    |
| Decreased breath sounds                                           | 35 (17.7)                    | 120 (37.2)                  | 4 (20.0)                   | <0.001                    |
| Chest retraction                                                  | 36 (18.2)                    | 28 (8.7)                    | 1 (5.0)                    | 0.003                     |
| <b>Radiographic finding</b>                                       |                              |                             |                            |                           |
| Bronchial infiltration                                            | 132 (66.7)                   | 107 (33.1)                  | 3 (15.0)                   | <0.001                    |
| Consolidation                                                     | 94 (47.5)                    | 269 (83.3)                  | 16 (80.0)                  | <0.001                    |
| Pleural effusion                                                  | 8 (4.0)                      | 51 (15.8)                   | 7 (35.0)                   | <0.001                    |
| <b>Treatment and Hospitalization</b>                              |                              |                             |                            |                           |
| IV antibiotics $\geq 3$ days                                      | 126 (63.6)                   | 183 (56.7)                  | 20 (100.0)                 | <0.001                    |
| Steroid $\geq 3$ days                                             | 56 (28.3)                    | 153 (47.4)                  | 3 (15.0)                   | <0.001                    |
| Length of stay, days, median (IQR)<br>[n = 191/283/20]            | 5.0 (4.0–10.0)               | 6 (4.0–8.0)                 | 12.0 (7.0–26.0)            | <0.001                    |
| <b>Inflammatory markers</b>                                       |                              |                             |                            |                           |
| WBC, $\times 10^3/\mu\text{L}$ , median (IQR)<br>[n = 191/316/20] | 9.5<br>(6.2–14.0)            | 8.1<br>(6.2–11.3)           | 22.2<br>(14.4–31.8)        | <0.001                    |
| CRP, mg/dL, median (IQR)<br>[n = 198/321/20]                      | 2.2<br>(0.5–5.6)             | 3.5<br>(1.2–8.7)            | 15.3<br>(7.8–23.5)         | <0.001                    |
| Procalcitonin, ng/mL, median (IQR)<br>[n = 100/161/17]            | 0.2<br>(0.1–1.6)             | 0.1<br>(0.1–0.3)            | 0.5<br>(0.2–6.2)           | <0.001                    |

Sample sizes for each variable are indicated where applicable.

CAP, community-acquired pneumonia; IQR, interquartile range.
